# Supplementary material for: A single 36-h water-only fast vastly remodels the plasma lipidome
Source: Front Cardiovasc Med. 2023 Sep 7;10:1251122. doi: 10.3389/fcvm.2023.1251122 (PMC10513913; doi:10.3389/fcvm.2023.1251122)
Supplement: Supplementary file 5 [file Table5.xlsx]

## Sheet: Sheet1
Variable	Importance	class
LPE(18:1)	3.71122	LPE
LPC(18:2)	2.65196	LPC
FFA(20:1)	2.11311	FFA
LPE(18:2)	2.06899	LPE
TAG50:5FA16:1	1.89835	TAG
FFA(20:3)	1.89737	FFA
PE(18:1/18:1)	1.544	PE
TAG56:1FA16:0	1.27374	TAG
FFA(20:2)	1.20688	FFA
DCER(26:0)	1.04789	DCER
TAG50:4FA16:1	0.939208	TAG
DAG(16:1/18:3)	0.86917	DAG
FFA(16:1)	0.830683	FFA
DAG(18:1/20:4)	0.714929	DAG
FFA(14:0)	0.635617	FFA
FFA(22:1)	0.632033	FFA
FFA(17:0)	0.601815	FFA
FFA(14:1)	0.573494	FFA
PC(18:1/16:1)	0.541786	PC
TAG51:4FA16:1	0.523079	TAG
TAG54:5FA16:1	0.512473	TAG
TAG54:0FA16:0	0.472901	TAG
FFA(20:4)	0.467898	FFA
FFA(22:4)	0.425238	FFA
TAG44:0FA18:0	0.407962	TAG
PC(18:2/20:3)	0.367205	PC
LPC(17:0)	0.340709	LPC
PE(18:0/18:1)	0.339901	PE
TAG56:1FA18:1	0.304635	TAG
TAG58:2FA18:1	0.303843	TAG
PC(18:2/18:2)	0.29407	PC
TAG56:7FA20:4	0.292714	TAG
FFA(18:2)	0.288638	FFA
DAG(16:0/20:4)	0.242212	DAG
PC(14:0/20:3)	0.221998	PC
PC(14:0/18:2)	0.209635	PC
TAG58:10FA20:4	0.196446	TAG
FFA(22:2)	0.191432	FFA
FFA(18:0)	0.189888	FFA
TAG53:1FA16:0	0.188163	TAG
PI(18:1/18:1)	0.18469	PI
MAG(18:2)	0.184599	MAG
TAG50:2FA20:2	0.17771	TAG
FFA(15:0)	0.17353	FFA
TAG56:10FA18:2	0.168554	TAG
PE(P18:1/18:2)	0.155982	PE
PE(P18:0/16:0)	0.15348	PE
TAG51:3FA16:1	0.150068	TAG
TAG52:5FA20:3	0.147006	TAG
TAG55:7FA20:4	0.144433	TAG
DAG(18:2/20:4)	0.142844	DAG
TAG56:2FA16:0	0.137594	TAG
PE(18:1/18:2)	0.137117	PE
PC(18:0/18:3)	0.136527	PC
PE(18:2/16:1)	0.1347	PE
TAG44:3FA18:2	0.133101	TAG
TAG50:4FA16:0	0.129325	TAG
DCER(16:0)	0.129017	DCER
LPC(20:4)	0.125665	LPC
TAG56:6FA20:4	0.124953	TAG
LPE(16:0)	0.119946	LPE
TAG54:3FA20:2	0.119011	TAG
TAG55:5FA18:1	0.117991	TAG
TAG56:8FA20:4	0.11763	TAG
TAG52:5FA18:1	0.114442	TAG
TAG58:3FA18:1	0.114119	TAG
TAG54:6FA16:1	0.112315	TAG
LCER(26:0)	0.111421	LCER
LPC(18:1)	0.109439	LPC
TAG49:1FA14:0	0.109015	TAG
TAG56:3FA18:2	0.107681	TAG
LPC(16:1)	0.106879	LPC
FFA(24:0)	0.106186	FFA
TAG54:8FA20:5	0.104805	TAG
LPE(20:4)	0.104028	LPE
TAG52:4FA16:1	0.102259	TAG
LCER(18:1)	0.101375	LCER
TAG54:6FA18:2	0.0984139	TAG
TAG58:9FA22:5	0.0982568	TAG
PC(18:2/16:1)	0.0969698	PC
TAG56:2FA18:1	0.0951156	TAG
TAG57:3FA18:2	0.094752	TAG
DAG(16:1/18:1)	0.0935317	DAG
TAG49:3FA18:3	0.092719	TAG
TAG50:2FA16:1	0.0926953	TAG
TAG57:2FA18:1	0.0891597	TAG
TAG51:2FA16:1	0.0889427	TAG
TAG48:5FA18:2	0.0868229	TAG
TAG40:0FA16:0	0.0860495	TAG
DAG(14:1/18:1)	0.0850658	DAG
PC(16:0/14:0)	0.0820907	PC
TAG52:0FA20:0	0.0818429	TAG
TAG42:2FA18:2	0.0785437	TAG
PE(16:0/18:2)	0.0781993	PE
TAG52:4FA20:3	0.0773699	TAG
TAG50:1FA20:1	0.076848	TAG
FFA(18:1)	0.0768363	FFA
TAG49:1FA16:1	0.0759847	TAG
TAG52:2FA14:0	0.0751555	TAG
LCER(24:1)	0.073529	LCER
DCER(22:2)	0.0714582	DCER
TAG58:10FA18:2	0.0701374	TAG
PE(18:1/20:4)	0.0699052	PE
FFA(22:6)	0.0696655	FFA
TAG52:6FA16:0	0.0696256	TAG
LPC(18:0)	0.0692656	LPC
PE(P16:0/18:2)	0.0687583	PE
MAG(14:1)	0.0677999	MAG
TAG55:2FA18:1	0.0673779	TAG
TAG58:6FA20:4	0.0662884	TAG
DCER(14:0)	0.0659599	DCER
TAG50:0FA14:0	0.0654912	TAG
TAG54:0FA18:0	0.0648708	TAG
LCER(26:1)	0.0648205	LCER
TAG48:4FA12:0	0.0644069	TAG
TAG50:3FA20:3	0.062832	TAG
PI(18:0/18:1)	0.0625342	PI
TAG52:8FA16:1	0.0619813	TAG
PE(O18:0/22:5)	0.061578	PE
TAG52:6FA18:1	0.0614909	TAG
MAG(22:6)	0.0614714	MAG
PC(18:2/18:3)	0.0613126	PC
FFA(22:5)	0.060762	FFA
TAG52:6FA20:5	0.0606663	TAG
PC(16:0/20:4)	0.0603814	PC
TAG54:2FA20:2	0.0599464	TAG
TAG52:2FA20:2	0.0598203	TAG
TAG46:4FA18:2	0.0588435	TAG
LPC(22:5)	0.058768	LPC
TAG55:4FA18:1	0.0587267	TAG
TAG58:8FA22:5	0.0586263	TAG
TAG44:2FA18:2	0.058132	TAG
TAG48:4FA20:4	0.0580827	TAG
TAG54:3FA16:1	0.0577492	TAG
TAG52:6FA16:1	0.0575189	TAG
PC(14:0/20:4)	0.0565624	PC
TAG55:7FA15:0	0.0564815	TAG
TAG50:3FA16:1	0.0563315	TAG
TAG52:6FA20:4	0.0537237	TAG
PC(18:1/22:6)	0.0534053	PC
DAG(16:1/18:0)	0.0532341	DAG
DAG(12:0/18:1)	0.0528389	DAG
TAG47:1FA18:1	0.0523822	TAG
MAG(18:1)	0.0521016	MAG
TAG56:3FA20:0	0.0518885	TAG
TAG54:4FA20:1	0.0518811	TAG
TAG56:7FA18:2	0.0514288	TAG
TAG53:6FA18:1	0.0514066	TAG
LCER(20:0)	0.0512975	LCER
MAG(20:0)	0.049576	MAG
TAG49:0FA18:0	0.0492157	TAG
LPC(20:3)	0.0484985	LPC
TAG50:6FA20:4	0.0483647	TAG
TAG55:6FA20:3	0.0472066	TAG
TAG54:5FA22:4	0.0471883	TAG
TAG54:4FA16:1	0.0469358	TAG
PE(O16:0/22:6)	0.046852	PE
TAG54:5FA20:2	0.0459874	TAG
PE(O16:0/22:5)	0.0458518	PE
TAG54:4FA20:2	0.0456371	TAG
TAG56:7FA16:1	0.0453241	TAG
MAG(22:0)	0.0452822	MAG
TAG56:3FA20:2	0.0452718	TAG
TAG48:4FA14:0	0.0452556	TAG
TAG50:2FA18:0	0.0436433	TAG
FFA(22:0)	0.0434685	FFA
TAG56:6FA20:3	0.042728	TAG
TAG42:1FA18:1	0.042438	TAG
DCER(24:1)	0.04242	DCER
SM(20:1)	0.0424054	SM
TAG58:7FA16:0	0.0421526	TAG
TAG52:6FA18:2	0.041956	TAG
TAG54:5FA18:0	0.0418994	TAG
TAG50:4FA18:3	0.0411997	TAG
SM(18:1)	0.0405775	SM
TAG56:2FA20:1	0.0404056	TAG
TAG58:7FA22:5	0.0401174	TAG
LCER(20:1)	0.0398246	LCER
CE(18:4)	0.0396499	CE
TAG56:2FA20:0	0.0395816	TAG
DAG(16:1/16:1)	0.0392695	DAG
TAG46:3FA18:1	0.0391106	TAG
FFA(20:5)	0.0387739	FFA
TAG55:4FA18:2	0.0383231	TAG
PC(18:0/22:5)	0.0381286	PC
TAG54:6FA20:3	0.038113	TAG
MAG(20:5)	0.0381033	MAG
TAG55:3FA18:2	0.0376632	TAG
TAG54:7FA18:3	0.0374822	TAG
TAG49:3FA16:0	0.0362489	TAG
PE(16:0/22:6)	0.0358712	PE
TAG52:3FA16:1	0.0357205	TAG
TAG54:7FA18:1	0.0356432	TAG
PE(P18:1/16:0)	0.034747	PE
PC(18:1/20:3)	0.0346256	PC
TAG52:5FA16:0	0.0345685	TAG
TAG54:1FA16:0	0.0344722	TAG
TAG54:5FA18:3	0.034035	TAG
TAG47:1FA14:0	0.0335833	TAG
TAG42:0FA12:0	0.0335178	TAG
TAG52:4FA14:0	0.0329377	TAG
TAG56:6FA18:3	0.0326264	TAG
PC(18:0/20:4)	0.0322257	PC
PE(P18:0/18:1)	0.0315741	PE
DAG(16:1/18:2)	0.0313238	DAG
DAG(18:2/20:3)	0.0307187	DAG
TAG48:0FA18:0	0.0306884	TAG
CER(20:1)	0.030444	CER
TAG50:2FA14:1	0.0303339	TAG
DAG(16:0/16:0)	0.0302439	DAG
TAG54:5FA20:4	0.0299408	TAG
CE(24:0)	0.0296718	CE
TAG52:7FA16:0	0.029321	TAG
PC(16:0/22:5)	0.0293056	PC
PE(P18:0/22:5)	0.0289906	PE
DCER(26:1)	0.0288506	DCER
TAG50:5FA18:3	0.0287536	TAG
TAG52:2FA18:0	0.0280742	TAG
TAG36:0FA12:0	0.0279499	TAG
PE(P18:0/18:2)	0.027919	PE
PC(18:0/16:1)	0.0279114	PC
TAG54:8FA20:4	0.0271273	TAG
PC(18:0/18:1)	0.02698	PC
SM(26:1)	0.0268145	SM
TAG48:3FA16:1	0.0267765	TAG
TAG54:8FA18:2	0.0262424	TAG
PC(17:0/20:4)	0.02604	PC
MAG(20:2)	0.0259755	MAG
TAG56:2FA18:0	0.0258996	TAG
TAG47:1FA17:0	0.0258933	TAG
PE(P18:1/22:4)	0.0258908	PE
TAG55:5FA18:2	0.0256889	TAG
TAG54:5FA20:5	0.0255376	TAG
CE(22:6)	0.025464	CE
MAG(16:0)	0.0254434	MAG
TAG55:7FA18:1	0.0253539	TAG
DAG(16:0/20:3)	0.0253455	DAG
TAG53:7FA18:3	0.0253437	TAG
TAG54:7FA18:2	0.0252696	TAG
PE(P16:0/18:1)	0.0251689	PE
TAG60:10FA22:5	0.0249667	TAG
PE(O18:0/22:6)	0.0247074	PE
TAG54:3FA16:0	0.0246539	TAG
PC(16:0/20:2)	0.0242017	PC
TAG48:2FA16:1	0.0241971	TAG
PE(P16:0/20:3)	0.0239879	PE
TAG55:6FA18:1	0.0239431	TAG
TAG54:5FA22:1	0.0239428	TAG
DAG(12:0/18:0)	0.0239372	DAG
PC(16:0/16:0)	0.0234174	PC
TAG40:0FA14:0	0.0233333	TAG
TAG58:6FA22:5	0.0230797	TAG
DAG(18:1/20:3)	0.0230453	DAG
TAG53:6FA20:4	0.0230202	TAG
TAG44:2FA16:0	0.0230083	TAG
DAG(18:0/18:2)	0.0229997	DAG
CE(20:2)	0.0229258	CE
TAG52:3FA20:2	0.022779	TAG
TAG46:0FA16:0	0.0227588	TAG
TAG42:0FA16:0	0.0226116	TAG
TAG54:7FA20:4	0.0214496	TAG
TAG49:3FA18:2	0.0212256	TAG
TAG50:1FA16:1	0.0212194	TAG
PC(15:0/18:2)	0.0212106	PC
DAG(14:0/16:1)	0.0211758	DAG
CE(20:1)	0.0211315	CE
TAG54:1FA18:0	0.0209548	TAG
TAG44:1FA14:0	0.0207954	TAG
TAG51:4FA18:3	0.0207714	TAG
TAG52:4FA20:2	0.0206757	TAG
CE(16:1)	0.0206632	CE
TAG52:5FA16:1	0.0206099	TAG
TAG52:2FA16:1	0.0203682	TAG
DAG(18:2/22:4)	0.0202623	DAG
MAG(14:0)	0.0202346	MAG
TAG46:2FA16:0	0.019952	TAG
TAG56:4FA18:1	0.0199241	TAG
TAG58:7FA22:6	0.0195551	TAG
LCER(22:0)	0.0194669	LCER
LPC(15:0)	0.0193943	LPC
PE(O18:0/18:1)	0.0192927	PE
TAG44:0FA12:0	0.0192118	TAG
TAG45:1FA16:0	0.0191498	TAG
TAG52:5FA20:5	0.0191296	TAG
TAG54:6FA20:5	0.0191102	TAG
TAG56:7FA20:3	0.0190667	TAG
PE(O16:0/20:4)	0.0188664	PE
HCER(24:1)	0.0188583	HCER
PC(14:0/18:1)	0.0186727	PC
TAG54:8FA18:3	0.0184913	TAG
TAG56:7FA22:4	0.0184011	TAG
TAG58:5FA18:1	0.0183278	TAG
PE(18:0/22:5)	0.0182727	PE
TAG56:8FA16:1	0.0179545	TAG
TAG48:4FA18:1	0.0176667	TAG
TAG54:3FA18:1	0.0176591	TAG
LPE(20:3)	0.0176254	LPE
TAG56:4FA20:4	0.0175836	TAG
TAG56:5FA20:4	0.0175008	TAG
TAG47:2FA18:2	0.0173199	TAG
TAG54:1FA20:0	0.0172535	TAG
PI(18:0/20:4)	0.0170667	PI
TAG50:5FA14:1	0.0169279	TAG
LPC(22:6)	0.0166616	LPC
TAG54:3FA18:2	0.0166522	TAG
TAG58:8FA18:1	0.0166246	TAG
TAG52:6FA18:3	0.0166207	TAG
LPC(16:0)	0.0165947	LPC
TAG58:10FA22:5	0.0165225	TAG
PE(P18:0/20:3)	0.0164842	PE
TAG55:3FA18:1	0.0164355	TAG
HCER(26:0)	0.0161923	HCER
TAG54:2FA20:0	0.0159141	TAG
TAG58:7FA20:4	0.01588	TAG
PE(18:0/22:6)	0.0156675	PE
TAG47:2FA18:1	0.0156638	TAG
CE(15:0)	0.0155035	CE
PC(18:1/18:3)	0.0154143	PC
TAG51:5FA18:3	0.0153783	TAG
PI(18:0/18:2)	0.0152522	PI
TAG54:4FA18:0	0.0151667	TAG
PE(P18:0/22:4)	0.0150802	PE
TAG54:6FA20:4	0.0150728	TAG
CE(20:0)	0.0150629	CE
TAG56:3FA20:1	0.0150585	TAG
PC(20:0/18:2)	0.015033	PC
PC(18:1/20:4)	0.0149779	PC
TAG58:7FA18:2	0.0148667	TAG
PE(P16:0/22:5)	0.0148111	PE
MAG(16:1)	0.0146774	MAG
TAG58:8FA18:2	0.0146327	TAG
PE(P18:0/20:4)	0.0143819	PE
TAG56:6FA20:2	0.014303	TAG
PI(18:0/20:3)	0.0142409	PI
TAG58:8FA22:6	0.0141991	TAG
CER(26:1)	0.0141818	CER
CER(18:0)	0.0140404	CER
PC(18:0/20:5)	0.0139688	PC
TAG50:5FA18:1	0.0139264	TAG
DAG(16:1/20:0)	0.0138667	DAG
TAG42:0FA14:0	0.0138667	TAG
TAG56:6FA20:5	0.0135385	TAG
TAG49:1FA15:0	0.0135333	TAG
CE(17:0)	0.0134528	CE
TAG47:2FA16:1	0.0133714	TAG
TAG56:8FA16:0	0.0133333	TAG
TAG55:2FA18:2	0.0133088	TAG
CE(20:4)	0.0131189	CE
PC(16:0/22:6)	0.0131146	PC
TAG54:5FA18:1	0.0130286	TAG
TAG56:7FA18:3	0.0129572	TAG
TAG53:4FA18:0	0.0128821	TAG
MAG(17:0)	0.0126601	MAG
SM(18:0)	0.0126028	SM
TAG54:5FA18:2	0.0125238	TAG
TAG54:5FA20:3	0.0123852	TAG
CE(22:5)	0.0123593	CE
TAG58:9FA20:4	0.0121433	TAG
TAG49:2FA14:0	0.0119493	TAG
TAG50:5FA16:0	0.0119493	TAG
MAG(15:0)	0.0118627	MAG
TAG46:1FA18:0	0.0112547	TAG
TAG55:8FA20:4	0.0112256	TAG
TAG52:1FA18:1	0.0111594	TAG
CE(12:0)	0.0111189	CE
TAG56:3FA16:0	0.0110988	TAG
TAG52:2FA18:2	0.0110909	TAG
FFA(12:0)	0.0110741	FFA
PC(18:0/20:3)	0.0110741	PC
TAG46:2FA12:0	0.0110741	TAG
TAG54:6FA22:6	0.0110741	TAG
DAG(14:0/22:6)	0.01102	DAG
TAG47:1FA16:1	0.0108333	TAG
TAG60:12FA22:6	0.0108198	TAG
SM(20:0)	0.0107391	SM
DAG(18:1/20:1)	0.0106364	DAG
PC(16:0/18:2)	0.0105	PC
PC(18:0/22:4)	0.0104533	PC
TAG56:7FA22:6	0.0104524	TAG
DAG(12:0/16:0)	0.0104348	DAG
TAG58:6FA22:4	0.0104126	TAG
HCER(24:0)	0.010397	HCER
PE(P18:1/18:1)	0.0103636	PE
TAG53:5FA20:4	0.0103636	TAG
DAG(12:0/18:2)	0.0103175	DAG
DAG(18:2/22:6)	0.0103029	DAG
TAG44:2FA14:0	0.01024	TAG
TAG58:9FA22:6	0.0101333	TAG
TAG58:10FA22:6	0.0100238	TAG
DAG(18:1/20:2)	0.00991651	DAG
TAG56:5FA18:2	0.00991304	TAG
TAG54:4FA18:3	0.00990618	TAG
CER(16:0)	0.00989091	CER
DAG(16:1/20:4)	0.00981818	DAG
TAG50:4FA14:1	0.00974026	TAG
PC(18:0/20:2)	0.00959524	PC
TAG38:0FA12:0	0.00955835	TAG
PC(20:0/18:1)	0.00952381	PC
TAG58:8FA20:3	0.00943188	TAG
TAG51:0FA16:0	0.00938756	TAG
HCER(26:1)	0.00937124	HCER
TAG51:1FA17:0	0.00936232	TAG
TAG54:2FA18:0	0.00933818	TAG
CE(18:0)	0.00931159	CE
DAG(14:0/20:4)	0.00921212	DAG
TAG52:4FA20:4	0.00918545	TAG
TAG56:8FA22:5	0.00916078	TAG
DCER(24:0)	0.00914286	DCER
TAG52:4FA22:1	0.0090903	TAG
TAG51:1FA18:0	0.00897308	TAG
TAG51:2FA16:0	0.00890909	TAG
TAG58:9FA18:2	0.00876768	TAG
DAG(16:0/18:0)	0.00871071	DAG
PC(16:0/22:4)	0.00852843	PC
HCER(22:1)	0.00849275	HCER
PC(16:0/18:3)	0.0082963	PC
TAG60:11FA22:6	0.0082963	TAG
FFA(16:0)	0.00822222	FFA
TAG46:2FA14:0	0.00821333	TAG
CE(22:1)	0.00816667	CE
CE(22:4)	0.00811594	CE
CER(24:1)	0.00811594	CER
TAG46:1FA14:0	0.00811594	TAG
TAG46:2FA16:1	0.00811594	TAG
DCER(20:0)	0.00806061	DCER
DCER(22:0)	0.007767	DCER
TAG42:1FA16:0	0.00773064	TAG
TAG54:6FA18:3	0.00771429	TAG
FFA(20:0)	0.00770667	FFA
PE(P16:0/20:4)	0.00769275	PE
TAG56:3FA18:0	0.00767532	TAG
TAG50:5FA20:4	0.00765152	TAG
MAG(22:1)	0.00756	MAG
FFA(18:4)	0.00751169	FFA
TAG56:7FA16:0	0.0075	TAG
HCER(22:0)	0.00738462	HCER
TAG44:2FA18:1	0.00738462	TAG
TAG48:1FA16:1	0.00738462	TAG
TAG54:3FA20:3	0.00736364	TAG
TAG54:3FA18:3	0.00736	TAG
MAG(18:3)	0.00733333	MAG
TAG42:1FA12:0	0.00733333	TAG
TAG46:2FA18:2	0.00733333	TAG
TAG48:1FA12:0	0.00733333	TAG
TAG52:3FA14:0	0.00733333	TAG
TAG52:6FA14:0	0.00733333	TAG
TAG53:2FA17:0	0.00733333	TAG
TAG53:2FA18:2	0.00733333	TAG
DAG(16:1/22:6)	0.00730435	DAG
TAG42:2FA12:0	0.00730435	TAG
TAG53:4FA18:2	0.00730435	TAG
TAG55:1FA18:1	0.00730435	TAG
TAG56:5FA20:2	0.00730435	TAG
HCER(20:1)	0.00727273	HCER
PC(18:2/20:4)	0.00727273	PC
TAG54:2FA18:2	0.00705391	TAG
TAG56:6FA22:6	0.00703333	TAG
TAG56:5FA20:1	0.00702061	TAG
MAG(18:0)	0.00697308	MAG
TAG52:3FA20:3	0.00690677	TAG
TAG56:9FA20:4	0.00690476	TAG
TAG50:0FA18:0	0.00686813	TAG
DAG(14:0/20:0)	0.00682051	DAG
TAG47:0FA15:0	0.00676174	TAG
DAG(18:2/22:5)	0.00648097	DAG
HCER(16:0)	0.00557143	HCER
TAG56:8FA18:2	0.00557143	TAG
FFA(24:1)	0.00555556	FFA
TAG57:8FA22:6	0.00555556	TAG
LCER(16:0)	0.00553846	LCER
CER(20:0)	0.00552	CER
TAG51:2FA18:0	0.00552	TAG
TAG46:3FA16:0	0.0055	TAG
PC(18:1/22:5)	0.00547826	PC
TAG56:8FA22:6	0.00547826	TAG
CE(22:2)	0.00545455	CE
PE(P18:1/20:4)	0.00545455	PE
TAG51:3FA18:2	0.00545455	TAG
SM(22:1)	0.0046	SM
PC(16:0/20:3)	0.00387879	PC
DAG(14:0/18:1)	0.00387097	DAG
TAG56:4FA20:2	0.00386207	TAG
TAG56:8FA18:3	0.00386207	TAG
TAG56:8FA20:5	0.00386207	TAG
PC(16:0/20:5)	0.00385714	PC
TAG51:3FA18:3	0.00385714	TAG
DAG(16:0/20:5)	0.00385185	DAG
LCER(14:0)	0.00385185	LCER
TAG44:1FA16:1	0.00385185	TAG
TAG48:2FA14:1	0.00385185	TAG
TAG51:4FA16:0	0.00385185	TAG
TAG52:4FA18:0	0.00384615	TAG
DAG(18:1/22:4)	0.00384	DAG
TAG44:2FA16:1	0.00384	TAG
TAG49:0FA16:0	0.00384	TAG
TAG49:3FA16:1	0.00384	TAG
TAG53:1FA17:0	0.00384	TAG
TAG53:1FA18:1	0.00384	TAG
TAG53:6FA18:3	0.00384	TAG
TAG55:7FA20:3	0.00384	TAG
CE(22:0)	0.00383333	CE
PC(16:0/18:1)	0.00383333	PC
TAG46:0FA18:0	0.00383333	TAG
TAG48:1FA18:1	0.00383333	TAG
TAG50:2FA14:0	0.00383333	TAG
TAG50:3FA16:0	0.00383333	TAG
TAG52:1FA20:0	0.00383333	TAG
TAG52:2FA20:1	0.00383333	TAG
TAG58:8FA20:4	0.00383333	TAG
CE(20:5)	0.00382609	CE
CER(18:1)	0.00382609	CER
DAG(14:0/16:0)	0.00382609	DAG
PC(16:0/16:1)	0.00382609	PC
PC(18:0/18:2)	0.00382609	PC
TAG47:0FA17:0	0.00382609	TAG
TAG51:2FA18:2	0.00382609	TAG
TAG52:5FA20:4	0.00382609	TAG
TAG53:1FA18:0	0.00382609	TAG
TAG53:5FA18:2	0.00382609	TAG
TAG54:4FA20:4	0.00382609	TAG
TAG58:7FA18:1	0.00382609	TAG
CE(20:3)	0.00381818	CE
CER(22:1)	0.00381818	CER
PC(18:1/18:1)	0.00381818	PC
TAG46:0FA12:0	0.00381818	TAG
TAG46:1FA14:1	0.00381818	TAG
TAG46:2FA18:1	0.00381818	TAG
TAG48:2FA18:0	0.00381818	TAG
TAG52:3FA22:1	0.00381818	TAG
TAG54:7FA22:6	0.00381818	TAG
TAG56:7FA20:5	0.00381818	TAG
SM(24:0)	0.00368667	SM
CE(24:1)	0.00366008	CE
TAG44:1FA16:0	0.00364502	TAG
TAG50:5FA20:5	0.00348918	TAG
CE(14:0)	0	CE
CE(14:1)	0	CE
CE(16:0)	0	CE
CE(18:1)	0	CE
CE(18:2)	0	CE
CE(18:3)	0	CE
CER(14:0)	0	CER
CER(22:0)	0	CER
CER(24:0)	0	CER
CER(26:0)	0	CER
DAG(14:0/14:0)	0	DAG
DAG(14:0/18:2)	0	DAG
DAG(14:0/18:3)	0	DAG
DAG(14:1/16:0)	0	DAG
DAG(15:0/18:1)	0	DAG
DAG(15:0/18:2)	0	DAG
DAG(16:0/16:1)	0	DAG
DAG(16:0/18:1)	0	DAG
DAG(16:0/18:2)	0	DAG
DAG(16:0/18:3)	0	DAG
DAG(16:0/22:5)	0	DAG
DAG(16:0/22:6)	0	DAG
DAG(16:1/20:2)	0	DAG
DAG(18:0/18:1)	0	DAG
DAG(18:0/18:3)	0	DAG
DAG(18:0/22:6)	0	DAG
DAG(18:1/18:1)	0	DAG
DAG(18:1/18:2)	0	DAG
DAG(18:1/20:5)	0	DAG
DAG(18:1/22:5)	0	DAG
DAG(18:1/22:6)	0	DAG
DAG(18:2/18:3)	0	DAG
DAG(18:2/20:5)	0	DAG
DCER(18:0)	0	DCER
DCER(22:1)	0	DCER
HCER(14:0)	0	HCER
HCER(18:0)	0	HCER
HCER(18:1)	0	HCER
HCER(20:0)	0	HCER
LCER(18:0)	0	LCER
LCER(22:1)	0	LCER
LCER(24:0)	0	LCER
LPE(18:0)	0	LPE
LPE(22:6)	0	LPE
MAG(12:0)	0	MAG
MAG(20:1)	0	MAG
MAG(20:3)	0	MAG
MAG(22:5)	0	MAG
MAG(24:0)	0	MAG
MAG(24:1)	0	MAG
PC(15:0/18:1)	0	PC
PC(16:0/18:0)	0	PC
PC(16:0/20:1)	0	PC
PC(17:0/18:1)	0	PC
PC(17:0/18:2)	0	PC
PC(18:0/18:0)	0	PC
PC(18:0/22:6)	0	PC
PC(18:1/18:2)	0	PC
PC(20:0/20:4)	0	PC
PE(16:0/18:1)	0	PE
PE(16:0/20:3)	0	PE
PE(16:0/20:4)	0	PE
PE(16:0/22:5)	0	PE
PE(18:0/18:0)	0	PE
PE(18:0/18:2)	0	PE
PE(18:0/20:3)	0	PE
PE(18:0/20:4)	0	PE
PE(O18:0/18:2)	0	PE
PE(O18:0/20:4)	0	PE
PE(P16:0/22:4)	0	PE
PE(P16:0/22:6)	0	PE
PE(P18:0/20:5)	0	PE
PE(P18:0/22:6)	0	PE
PE(P18:1/20:3)	0	PE
PE(P18:1/22:5)	0	PE
PE(P18:1/22:6)	0	PE
SM(14:0)	0	SM
SM(16:0)	0	SM
SM(22:0)	0	SM
SM(24:1)	0	SM
SM(26:0)	0	SM
TAG40:0FA12:0	0	TAG
TAG42:1FA14:0	0	TAG
TAG42:1FA16:1	0	TAG
TAG44:0FA14:0	0	TAG
TAG44:0FA16:0	0	TAG
TAG44:1FA12:0	0	TAG
TAG44:1FA14:1	0	TAG
TAG44:1FA18:1	0	TAG
TAG44:2FA12:0	0	TAG
TAG45:0FA14:0	0	TAG
TAG45:0FA15:0	0	TAG
TAG45:0FA16:0	0	TAG
TAG45:1FA15:0	0	TAG
TAG45:1FA18:1	0	TAG
TAG46:0FA14:0	0	TAG
TAG46:1FA12:0	0	TAG
TAG46:1FA16:0	0	TAG
TAG46:1FA16:1	0	TAG
TAG46:1FA18:1	0	TAG
TAG46:2FA14:1	0	TAG
TAG46:3FA12:0	0	TAG
TAG46:3FA14:0	0	TAG
TAG46:3FA14:1	0	TAG
TAG46:3FA16:1	0	TAG
TAG46:3FA18:2	0	TAG
TAG46:3FA18:3	0	TAG
TAG47:0FA14:0	0	TAG
TAG47:0FA16:0	0	TAG
TAG47:1FA15:0	0	TAG
TAG47:1FA16:0	0	TAG
TAG47:2FA14:0	0	TAG
TAG47:2FA15:0	0	TAG
TAG48:0FA14:0	0	TAG
TAG48:0FA16:0	0	TAG
TAG48:1FA14:0	0	TAG
TAG48:1FA14:1	0	TAG
TAG48:1FA16:0	0	TAG
TAG48:1FA18:0	0	TAG
TAG48:2FA12:0	0	TAG
TAG48:2FA14:0	0	TAG
TAG48:2FA16:0	0	TAG
TAG48:2FA18:1	0	TAG
TAG48:2FA18:2	0	TAG
TAG48:3FA12:0	0	TAG
TAG48:3FA14:0	0	TAG
TAG48:3FA14:1	0	TAG
TAG48:3FA16:0	0	TAG
TAG48:3FA18:1	0	TAG
TAG48:3FA18:2	0	TAG
TAG48:3FA18:3	0	TAG
TAG48:4FA14:1	0	TAG
TAG48:4FA16:0	0	TAG
TAG48:4FA16:1	0	TAG
TAG48:4FA18:2	0	TAG
TAG48:4FA18:3	0	TAG
TAG48:5FA18:3	0	TAG
TAG49:0FA15:0	0	TAG
TAG49:0FA17:0	0	TAG
TAG49:1FA16:0	0	TAG
TAG49:1FA17:0	0	TAG
TAG49:1FA18:1	0	TAG
TAG49:2FA15:0	0	TAG
TAG49:2FA16:0	0	TAG
TAG49:2FA16:1	0	TAG
TAG49:2FA17:0	0	TAG
TAG49:2FA18:1	0	TAG
TAG49:2FA18:2	0	TAG
TAG49:3FA15:0	0	TAG
TAG50:0FA16:0	0	TAG
TAG50:1FA14:0	0	TAG
TAG50:1FA16:0	0	TAG
TAG50:1FA18:0	0	TAG
TAG50:1FA18:1	0	TAG
TAG50:2FA16:0	0	TAG
TAG50:2FA18:1	0	TAG
TAG50:2FA18:2	0	TAG
TAG50:3FA14:0	0	TAG
TAG50:3FA14:1	0	TAG
TAG50:3FA18:0	0	TAG
TAG50:3FA18:1	0	TAG
TAG50:3FA18:2	0	TAG
TAG50:3FA18:3	0	TAG
TAG50:4FA14:0	0	TAG
TAG50:4FA18:1	0	TAG
TAG50:4FA18:2	0	TAG
TAG50:4FA20:3	0	TAG
TAG50:4FA20:4	0	TAG
TAG50:5FA14:0	0	TAG
TAG50:5FA18:2	0	TAG
TAG51:0FA17:0	0	TAG
TAG51:0FA18:0	0	TAG
TAG51:1FA15:0	0	TAG
TAG51:1FA16:0	0	TAG
TAG51:1FA18:1	0	TAG
TAG51:2FA15:0	0	TAG
TAG51:2FA17:0	0	TAG
TAG51:2FA18:1	0	TAG
TAG51:3FA15:0	0	TAG
TAG51:3FA16:0	0	TAG
TAG51:3FA17:0	0	TAG
TAG51:3FA18:1	0	TAG
TAG51:4FA15:0	0	TAG
TAG51:4FA18:1	0	TAG
TAG51:4FA18:2	0	TAG
TAG51:4FA20:4	0	TAG
TAG51:5FA18:2	0	TAG
TAG52:0FA16:0	0	TAG
TAG52:0FA18:0	0	TAG
TAG52:1FA16:0	0	TAG
TAG52:1FA16:1	0	TAG
TAG52:1FA18:0	0	TAG
TAG52:1FA20:1	0	TAG
TAG52:2FA16:0	0	TAG
TAG52:2FA18:1	0	TAG
TAG52:2FA20:0	0	TAG
TAG52:3FA16:0	0	TAG
TAG52:3FA18:0	0	TAG
TAG52:3FA18:1	0	TAG
TAG52:3FA18:2	0	TAG
TAG52:3FA18:3	0	TAG
TAG52:3FA20:0	0	TAG
TAG52:3FA20:1	0	TAG
TAG52:4FA16:0	0	TAG
TAG52:4FA18:1	0	TAG
TAG52:4FA18:2	0	TAG
TAG52:4FA18:3	0	TAG
TAG52:4FA20:0	0	TAG
TAG52:4FA22:4	0	TAG
TAG52:5FA14:0	0	TAG
TAG52:5FA18:2	0	TAG
TAG52:5FA18:3	0	TAG
TAG52:5FA22:5	0	TAG
TAG52:6FA22:6	0	TAG
TAG52:7FA18:1	0	TAG
TAG52:7FA20:5	0	TAG
TAG52:7FA22:6	0	TAG
TAG52:8FA18:2	0	TAG
TAG53:0FA16:0	0	TAG
TAG53:2FA16:0	0	TAG
TAG53:2FA18:0	0	TAG
TAG53:2FA18:1	0	TAG
TAG53:3FA16:0	0	TAG
TAG53:3FA17:0	0	TAG
TAG53:3FA18:0	0	TAG
TAG53:3FA18:1	0	TAG
TAG53:3FA18:2	0	TAG
TAG53:4FA16:0	0	TAG
TAG53:4FA17:0	0	TAG
TAG53:4FA18:1	0	TAG
TAG53:4FA18:3	0	TAG
TAG53:4FA20:4	0	TAG
TAG53:5FA18:1	0	TAG
TAG53:5FA18:3	0	TAG
TAG53:6FA18:2	0	TAG
TAG54:1FA18:1	0	TAG
TAG54:1FA20:1	0	TAG
TAG54:2FA16:0	0	TAG
TAG54:2FA18:1	0	TAG
TAG54:2FA20:1	0	TAG
TAG54:3FA18:0	0	TAG
TAG54:3FA20:1	0	TAG
TAG54:4FA16:0	0	TAG
TAG54:4FA18:1	0	TAG
TAG54:4FA18:2	0	TAG
TAG54:4FA20:3	0	TAG
TAG54:4FA22:1	0	TAG
TAG54:4FA22:4	0	TAG
TAG54:5FA16:0	0	TAG
TAG54:5FA22:5	0	TAG
TAG54:6FA16:0	0	TAG
TAG54:6FA18:1	0	TAG
TAG54:6FA22:5	0	TAG
TAG54:7FA16:1	0	TAG
TAG54:7FA20:5	0	TAG
TAG54:7FA22:5	0	TAG
TAG54:8FA22:6	0	TAG
TAG55:1FA16:0	0	TAG
TAG55:5FA20:4	0	TAG
TAG55:6FA20:4	0	TAG
TAG55:7FA22:6	0	TAG
TAG56:3FA18:1	0	TAG
TAG56:4FA16:0	0	TAG
TAG56:4FA18:0	0	TAG
TAG56:4FA18:2	0	TAG
TAG56:4FA20:1	0	TAG
TAG56:4FA20:3	0	TAG
TAG56:4FA22:4	0	TAG
TAG56:5FA16:0	0	TAG
TAG56:5FA18:0	0	TAG
TAG56:5FA18:1	0	TAG
TAG56:5FA20:3	0	TAG
TAG56:5FA22:4	0	TAG
TAG56:5FA22:5	0	TAG
TAG56:6FA16:0	0	TAG
TAG56:6FA18:0	0	TAG
TAG56:6FA18:1	0	TAG
TAG56:6FA18:2	0	TAG
TAG56:6FA22:4	0	TAG
TAG56:6FA22:5	0	TAG
TAG56:7FA18:0	0	TAG
TAG56:7FA18:1	0	TAG
TAG56:7FA22:5	0	TAG
TAG56:8FA18:1	0	TAG
TAG56:9FA18:3	0	TAG
TAG56:9FA20:5	0	TAG
TAG56:9FA22:6	0	TAG
TAG57:9FA22:6	0	TAG
TAG58:10FA20:5	0	TAG
TAG58:6FA16:0	0	TAG
TAG58:6FA18:0	0	TAG
TAG58:6FA18:1	0	TAG
TAG58:7FA18:0	0	TAG
TAG58:7FA22:4	0	TAG
TAG58:9FA18:1	0	TAG
TAG60:10FA22:6	0	TAG
TAG60:11FA22:5	0	TAG
